# Supplementary material
Source: PubMed Central journal article supplement (PMC6402982)
Supplement: NIHMS1520544-supplement-1.pdf [file NIHMS1520544-supplement-1.pdf]

## Supporting Information

### **PvdF of pyoverdinin biosynthesis is a structurally unique $N^{10}$ -formyltetrahydrofolate-dependent formyltransferase**

Nikola Kenjic<sup>1</sup>, Matthew R. Hoag<sup>2</sup>, Garrett C. Moraski<sup>3</sup>, Carol A. Caperelli<sup>4</sup>, Graham R. Moran<sup>5</sup>, and Audrey L. Lamb<sup>1,\*</sup>

<sup>1</sup>Department of Molecular Biosciences, 1200 Sunnyside Ave, University of Kansas, Lawrence, KS, 66045

<sup>2</sup>Department of Chemistry and Biochemistry, 3210 N Cramer St, University of Wisconsin-Milwaukee, Milwaukee, WI, 53211

<sup>3</sup>Department of Chemistry and Biochemistry, 103 Chemistry and Biochemistry Building, Montana State University, Bozeman, MT, 59717

<sup>4</sup>Winkle College of Pharmacy, University of Cincinnati, ML 0514, 231 Albert Sabin Way, MSB 3109B, Cincinnati, OH, 45267

<sup>5</sup>Department of Chemistry and Biochemistry, 1068 W Sheridan Rd, Loyola University Chicago, Chicago, IL 60660

## Contents

Figure S-1: Size exclusion chromatogram

Figure S-2: Michaelis-Menten kinetics using synthesized OHOrn as the varied substrate.

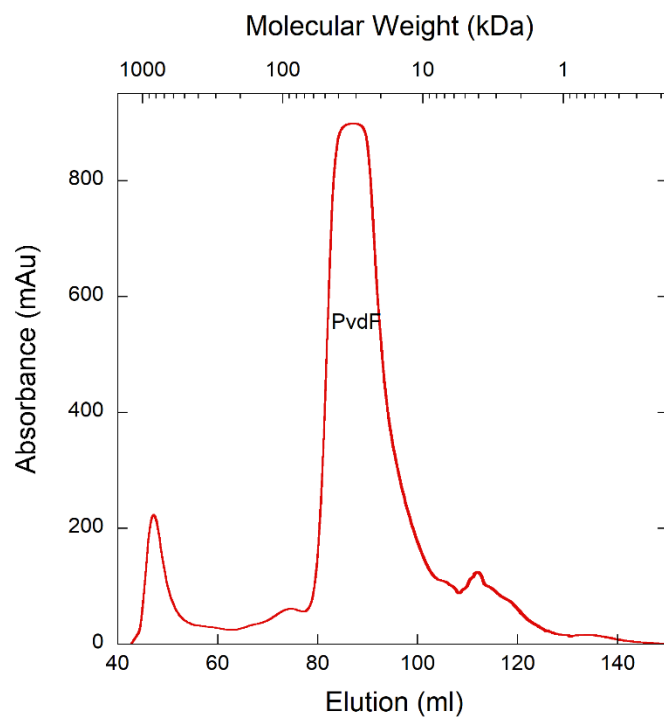

**Supplemental Figure S1.** Size exclusion chromatography elution profile from a Superdex 200 column (GE Healthcare). PvdF elutes only in the peak at 89 ml, consistent with the molecular weight of a monomer, 31 kDa.

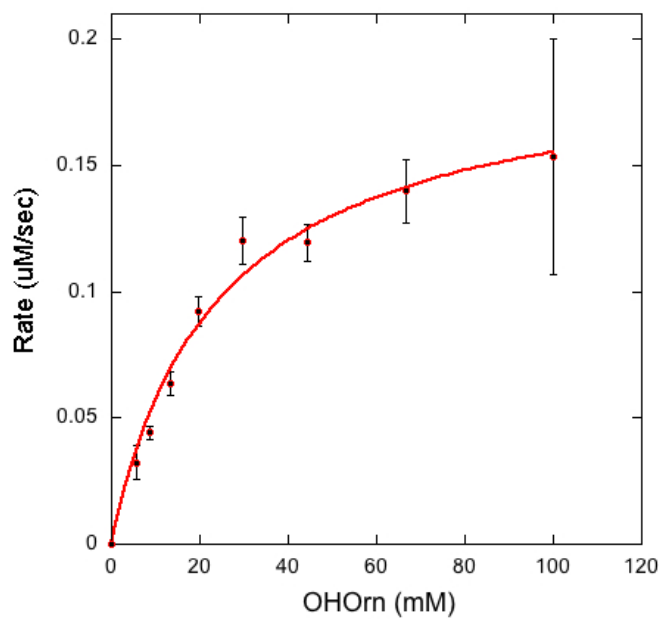

**Supplemental Figure S2.** Steady state kinetics in the presence of synthesized hydroxyornithine as a substrate. The high value of  $K_M$  is rationalized by the instability of the OHOrn substrate. This plot was generated in triplicate using a plate reader on a single day. The kinetic constants derived from the above plot are  $K_m = 30 \pm 10$  mM,  $k_{cat} = 1.0 \pm 0.2$  sec<sup>-1</sup>. On subsequent days, the  $K_M$  increased and  $k_{cat}$  decreased, and the experiment could not be reliably replicated.
